# Supplementary material for: A yellow-emissive carbon nanodot-based ratiometric fluorescent nanosensor for visualization of exogenous and endogenous hydroxyl radicals in the mitochondria of live cells
Source: Royal Society of Chemistry journal article supplement (doi:10.1039/c9tb00289h), 2019-01-01
Supplement: c9tb00289h1.pdf [file c9tb00289h1.pdf]

*Electronic Supporting Information*

*for*

**Yellow-emissive carbon nanodot-based ratiometric fluorescent  
nanosensor for visualization of exogenous and endogenous hydroxyl  
radicals in mitochondria of live cells**

Danling Zhou <sup>1</sup>, Hong Huang <sup>2,\*</sup>, Yangang Wang <sup>2,\*</sup>, Yan Wang <sup>1,\*</sup>, Zuming Hu <sup>1</sup>, Xi

Li <sup>2</sup>

<sup>1</sup> College of Materials Science and Engineering, Donghua University, Shanghai  
201620, China.

<sup>2</sup> College of Biological, Chemical Sciences and Engineering, Jiaxing University,  
Jiaxing 314001, China.

\*Corresponding author:

huangho17@163.com (*H. Huang*);

ygwang8136@mail.zjxu.edu.cn (*Y. Wang*);

wy@dhu.edu.cn (*Y. Wang*).

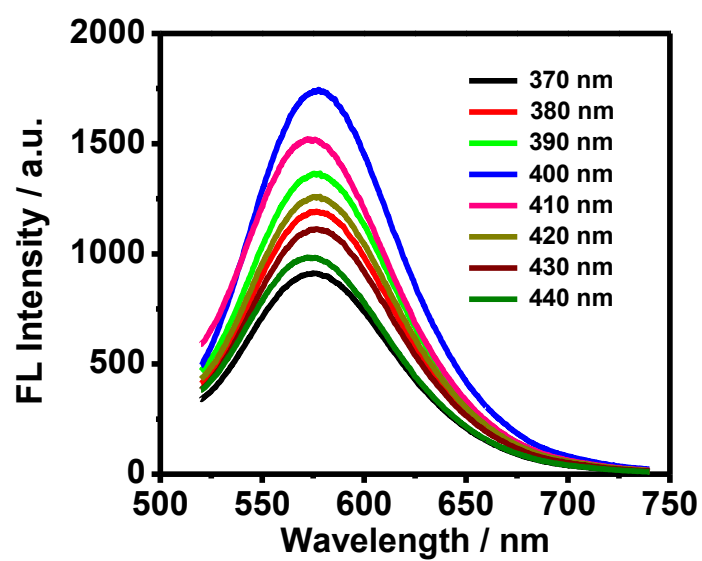

**Fig. S1** Fluorescence spectra of the CDs obtained under different excitation wavelength from 370 to 440 nm.

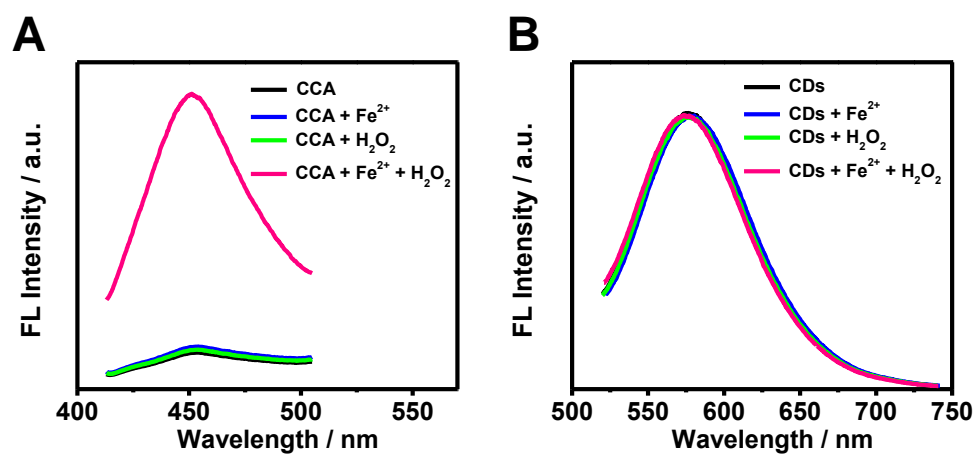

**Fig. S2** Fluorescence responses of (A) CCA and (B) CDs to 100  $\mu\text{M}$   $\text{Fe}^{2+}$ , 1 mM  $\text{H}_2\text{O}_2$ , and 100  $\mu\text{M}$   $\bullet\text{OH}$ .

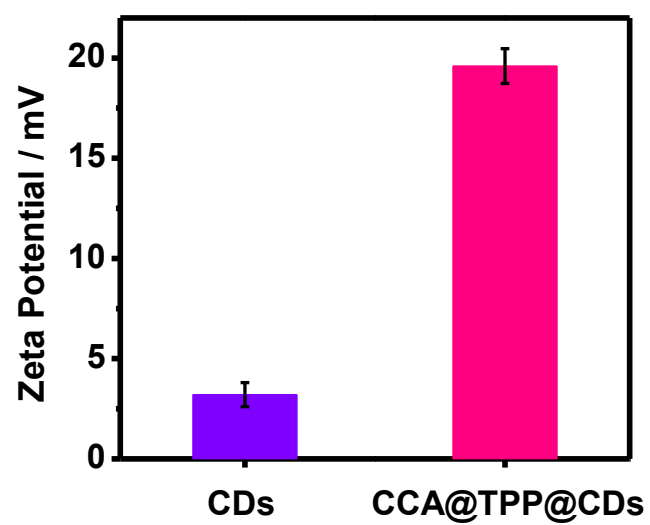

**Fig. S3** Zeta potentials of CDs and the CCA@TPP@CDs nanosensor. Zeta potentials of CDs and the CCA@TPP@CDs nanosensor were recorded at a concentration of  $60 \mu\text{g mL}^{-1}$  in aqueous solution.

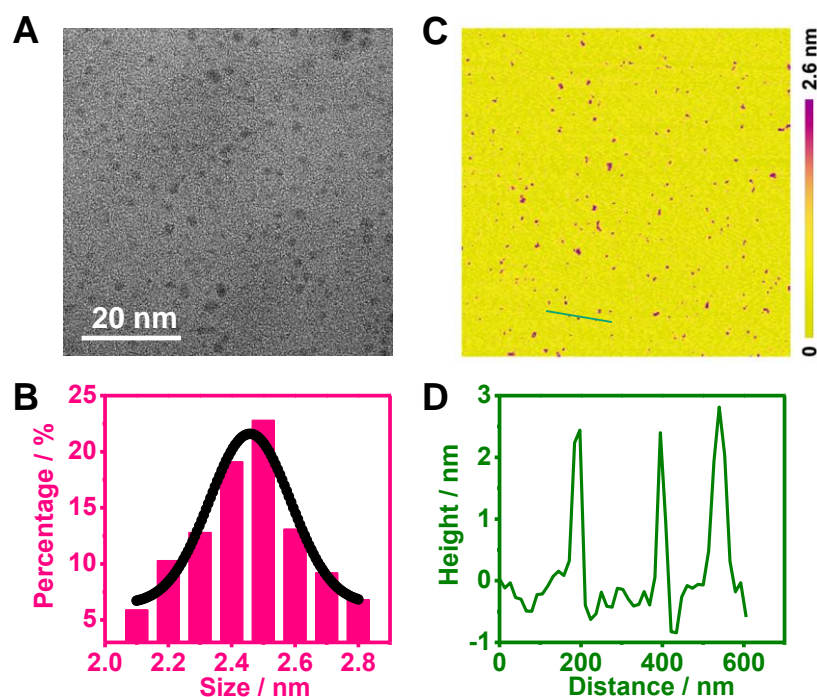

**Fig. S4** (A) Typical TEM image of the nanosensor. (B) The corresponding size-distribution histogram. (C) Representative AFM image of the nanosensor. (D) The height distribution of the nanosensor along the line.

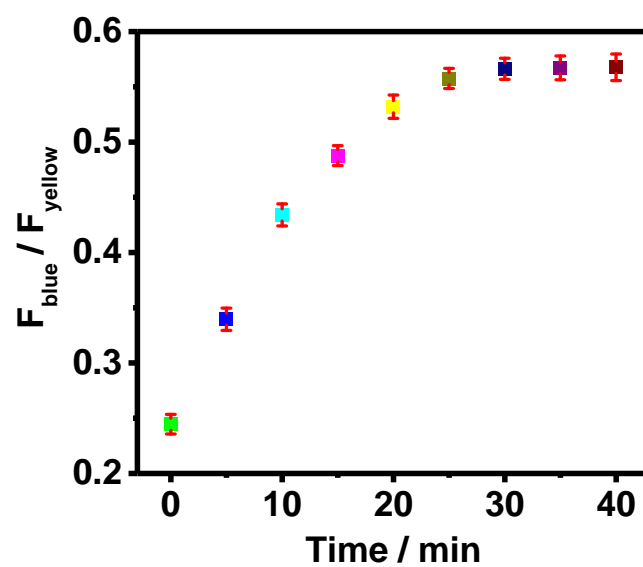

**Fig. S5** Time dependence of the fluorescence ratio of the nanosensor (60  $\mu\text{g/mL}$ ) in the presence of 100  $\mu\text{M}$   $\bullet\text{OH}$ .

**Table S1** Comparison of the performances of different fluorescent methods for the determination of •OH.

| FL method                                | Linear range (μM) | LOD (μM) | Manner           | Ref.      |
|------------------------------------------|-------------------|----------|------------------|-----------|
| Cyanine-based fluorochrome               | 0 - 60            | 0.038    | Single intensity | S1        |
| Citrate-capped CdTe QDs                  | 0.1 - 100         | -        | Single intensity | S2        |
| MPT-Cy2                                  | 1 - 10            | 1.16     | Single intensity | S3        |
| AuNC@HPF                                 | 1 - 150           | 0.68     | Ratiometric      | S4        |
| Si QDs–Ce6                               | 1 - 200           | 0.97     | Ratiometric      | S5        |
| Uniform Materials Based on Organic Salts | 0 - 25            | 0.769    | Ratiometric      | S6        |
| CCA@TPP@CDs                              | 0.1 - 160         | 0.070    | Ratiometric      | This work |

## References

- S1. H. Li, X. Li, W. Shi, Y. Xu and H. Ma, *Angew. Chem. Int. Ed.*, 2018, **57**, 12830-12834.
- S2. W. Zhou, Y. Cao, D. Sui and C. Lu, *Angew. Chem. Int. Edit.*, 2016, **55**, 4236-4241.
- S3. F. Liu, J. Du, D. Song, M. Xu and G. Sun, *Chem. Commun.*, 2016, **52**, 4636-4639.
- S4. M. Zhuang, C. Ding, A. Zhu and Y. Tian, *Anal. Chem.*, 2014, **86**, 1829-1836.
- S5. Q. Zhao, R. Zhang, D. Ye, S. Zhang, H. Chen and J. Kong, *ACS Appl. Mater. Interfaces*, 2017, **9**, 2052-2058.
- S6. M. Cong, N. Siraj, N. Bhattarai, P. E. Kolic, K. S. McCarter, P. K. Chhotaray and I. M. Warner, *Sens. Actuators B: Chem.*, 2018, **257**, 993-1000.

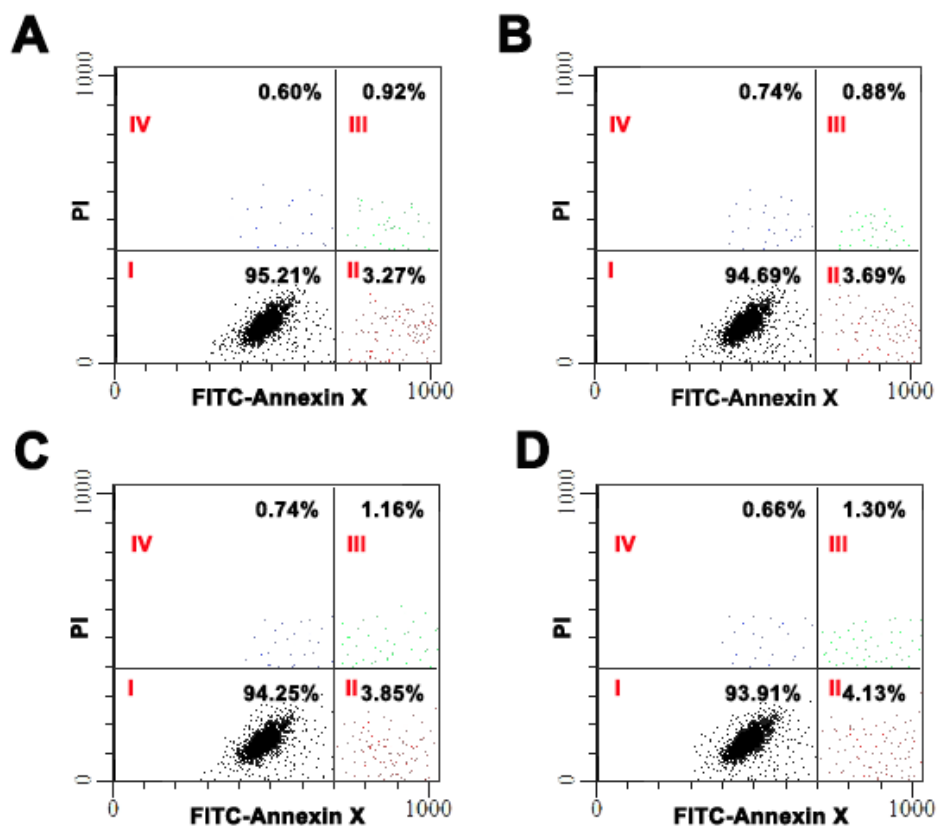

**Fig. S6** Apoptosis assay of RAW264.7 cells incubated with the nanosensor at concentrations of (A) 0  $\mu\text{g/mL}$ , (B) 40  $\mu\text{g/mL}$ , (C) 80  $\mu\text{g/mL}$ , and (D) 120  $\mu\text{g/mL}$ . I, II, III, and IV respectively represent the region of normal cells, early apoptotic cells, late apoptotic cells, and dead cells.

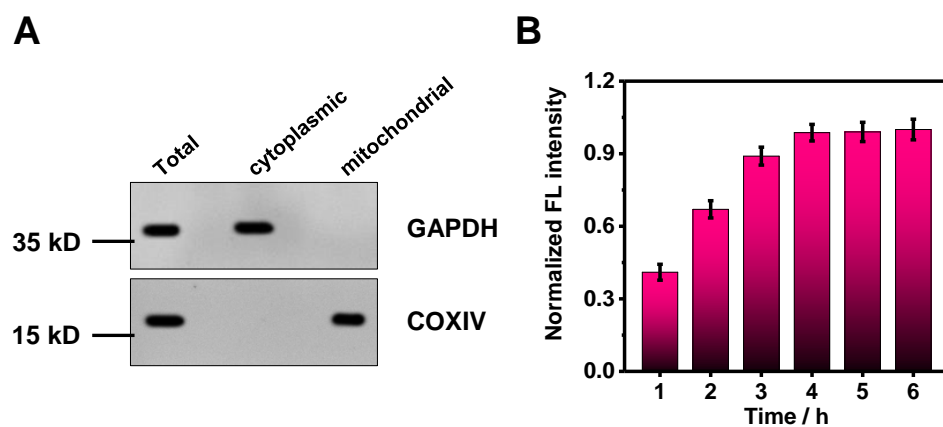

**Fig. S7** (A) Immunoblotting analysis of relative levels of GAPDH (cytoplasmic marker) and COXIV (mitochondrial marker) in cytoplasmic and mitochondrial fractions purified from cells. (B) Fluorescence intensity changes of the PBS solution containing isolated mitochondria.

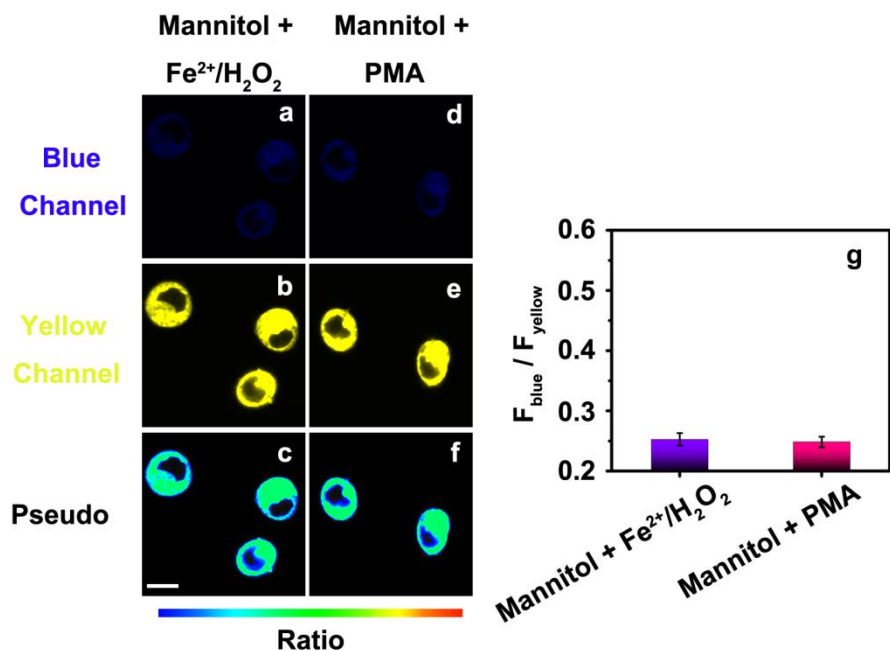

**Fig. S8** Fluorescence images of RAW264.7 cells under different treatments. (a, b, c) Fluorescence images of RAW264.7 cells that were treated with the nanosensor (60  $\mu\text{g}/\text{mL}$ ), mannitol (10 mM), and  $\bullet\text{OH}$  (100  $\mu\text{M}$ , generated from  $\text{Fe}^{2+}/\text{H}_2\text{O}_2$  system) in order. (d, e, f) Fluorescence images of RAW264.7 cells that were treated with the nanosensor (60  $\mu\text{g}/\text{mL}$ ), mannitol (10 mM), and PMA (2.0  $\mu\text{g}/\text{mL}$ ) in sequence. (a, d) Fluorescence images from the blue channel ( $\lambda_{\text{em}} = 420\text{-}500\text{ nm}$ ). (b, e) Fluorescence images from the yellow channel ( $\lambda_{\text{em}} = 530\text{-}610\text{ nm}$ ). (c, f) Pseudo-colored ratio images obtained from the blue and yellow channels. (g) The corresponding  $F_{\text{blue}}/F_{\text{yellow}}$ . Data are represented as mean  $\pm$  s.d. of 40 cells. Scale bar: 10  $\mu\text{m}$ .
